# Supplementary material
Source: ML conference proceedings conference paper supplement (https://proceedings.mlr.press/v80/muller18a.html)

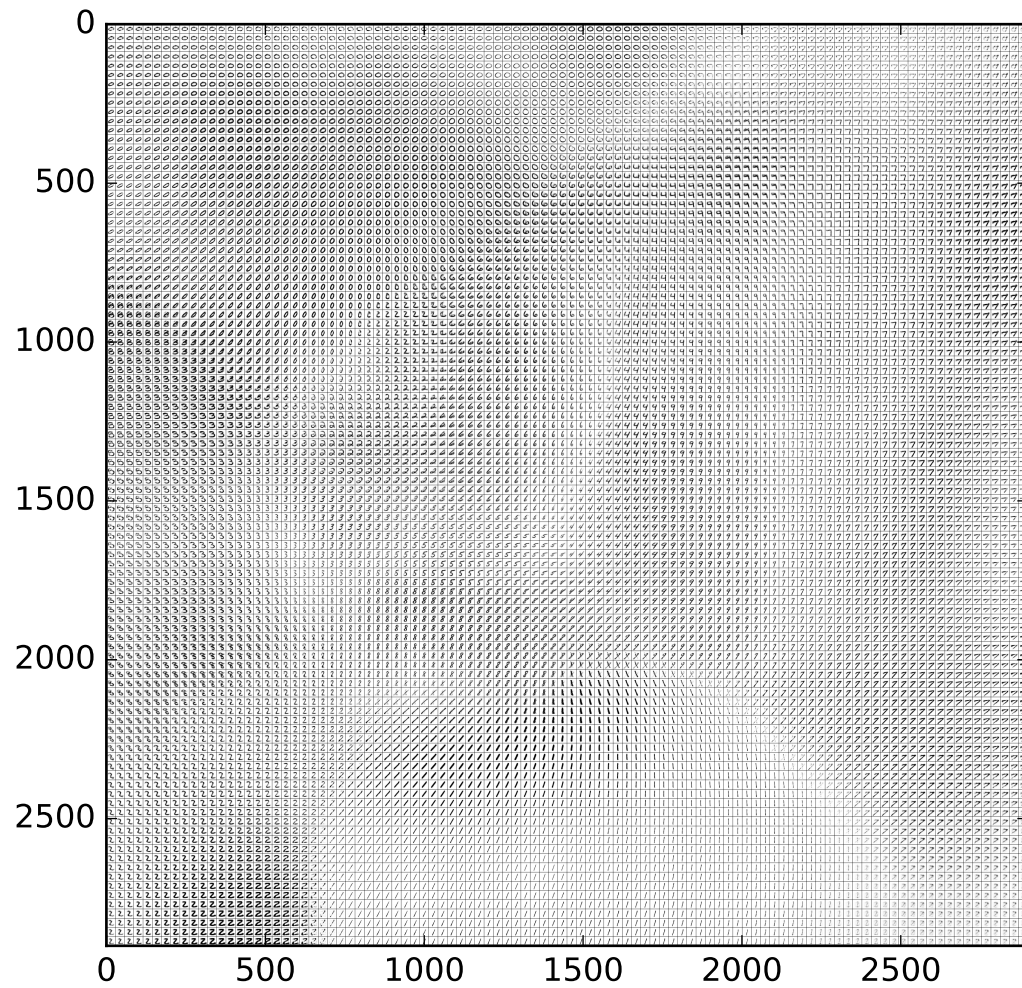

Supplement: Supplementary file 2 [file muller18a-supp.zip]
